# Supplementary material for: Evidence for Dopamine Abnormalities in the Substantia Nigra in Cocaine Addiction Revealed by Neuromelanin-Sensitive MRI
Source: Atypon-hosted journal article supplement (doi:10.1176/appi.ajp.2020.20010090), 2020-08-28
Supplement: appi.ajp.2020.20010090.ds001.pdf [file appi.ajp.2020.20010090.ds001.pdf]

Data supplement for Cassidy et al., Evidence for Dopamine Abnormalities in the Substantia Nigra in Cocaine Addiction Revealed by Neuromelanin-Sensitive MRI. Am J Psychiatry (doi: 10.1176/appi.ajp.2020.20010090)

TABLE S1. Topographical analysis of group differences in NM-MRI signal in substantia nigra

|           |   | $\beta$ | t     | p                  | df      | F   | R <sup>2</sup> |
|-----------|---|---------|-------|--------------------|---------|-----|----------------|
| Dimension | x | 0.072   | 9.34  | 10 <sup>-19</sup>  | 3, 1771 | 450 | 0.43           |
|           | y | -0.026  | -4.48 | 10 <sup>-5</sup>   |         |     |                |
|           | z | -0.28   | -30.7 | 10 <sup>-165</sup> |         |     |                |

Statistics from a multiple-linear regression analysis predicting t statistic of group difference (CUD vs control) across SN voxels as a function of their coordinates in x (absolute distance from the midline), y, and z directions. df=degrees of freedom
